# Supplementary material
Source: HighWire-hosted journal article supplement (https://erj.ersjournals.com/highwire/filestream/114226/field_highwire_adjunct_files/0/ERJ-00047-2013_Disclosures.pdf)
Supplement: ERJ-00047-2013_Disclosures.pdf [file ERJ-00047-2013_Disclosures.pdf]

**M.R. Sears** holds an Endowed Chair in Respiratory Epidemiology jointly funded by McMaster University and AstraZeneca. The author has received fees for speaking and consulting on behalf of AstraZeneca, including attending and speaking at FDA hearings on LABA safety in 2008 and 2010. He has acted as speaker or consultant to several other pharmaceutical companies including Centocor, GlaxoSmithKline, Merck, Nycomed and Schering-Plough, and has received research grants from AstraZeneca and Merck.

**F. Radner** is a full-time employee at AstraZeneca R&D, Molndal, Sweden.
